# Supplementary material
Source: HighWire-hosted journal article supplement (https://ijgc.bmj.com/highwire/filestream/23423/field_highwire_adjunct_files/6/ijgc-2021-003132supp007_data_supplement.pdf)
Supplement: ijgc-2021-003132supp007_data_supplement.pdf [file ijgc-2021-003132supp007_data_supplement.pdf]

**Supplemental Table 4.** The Number Needed to Screen to detect endometrial cancer or hyperplasia in female MMR Carriers by overall screening methods, endometrial biopsy alone, or transvaginal ultrasound alone. The number needed to screen of overall screening was calculated using sample size and number of cancers and/or hyperplasia detected. The number needed to screen of individual screening methods were calculated using the number of endometrial biopsies or transvaginal ultrasounds done, and the number of cancers and/or hyperplasia detected by endometrial biopsy or transvaginal ultrasound.

| Authors                               | Overall Screening by One or More Methods | Screening by Endometrial Biopsy                                           |                                         |                                              |                                                  | Screening by TVUS                                                         |                                         |                                              |                                                  |
|---------------------------------------|------------------------------------------|---------------------------------------------------------------------------|-----------------------------------------|----------------------------------------------|--------------------------------------------------|---------------------------------------------------------------------------|-----------------------------------------|----------------------------------------------|--------------------------------------------------|
|                                       | NNS to Detect One Cancer or Hyperplasia  | No. of Endometrial Cancers or Hyperplasia <sup>a</sup> /Number of Screens | NNS to Detect One Cancer or Hyperplasia | No. of Endometrial Cancers/Number of Screens | NNS to Detect One Cancer (excluding hyperplasia) | No. of Endometrial Cancers or Hyperplasia <sup>a</sup> /Number of Screens | NNS to Detect One Cancer or Hyperplasia | No. of Endometrial Cancers/Number of Screens | NNS to Detect One Cancer (excluding hyperplasia) |
| Dove-Edwin et al <sup>10</sup>        | 135                                      | *                                                                         | *                                       |                                              |                                                  | 0/522                                                                     |                                         | 0/522                                        |                                                  |
| Rijcken et al <sup>11</sup>           | 10                                       | *                                                                         | *                                       |                                              |                                                  | 3/Not provided                                                            | NA                                      | 0/Not provided                               | NA                                               |
| Renkonen-Sinisalo et al <sup>12</sup> | 8                                        | 18/372                                                                    | 20.7                                    | 9/372                                        | 41.4                                             | 7/473                                                                     | 67.5                                    | 2/473                                        | 236.4                                            |
| Lecuru et al <sup>13</sup>            | 10                                       | 0/116                                                                     |                                         | 0/116                                        |                                                  | #                                                                         | #                                       | #                                            | #                                                |
| Gerritzen et al <sup>14</sup>         | 14                                       | 4/49                                                                      | 12.3                                    | 1/49                                         | 49                                               | 2/221                                                                     | 110.5                                   | 1/221                                        | 221                                              |
| Jarvinen et al <sup>15</sup>          | 4                                        | Not provided                                                              | NA                                      | Not provided                                 | NA                                               | Not provided                                                              | NA                                      | Not provided                                 | NA                                               |
| Lecuru et al <sup>16</sup>            | 29                                       | 0/96                                                                      |                                         | 0/96                                         |                                                  | 0/96                                                                      |                                         | 0/96                                         |                                                  |
| Guillen-Ponce et al <sup>17</sup>     | 46                                       | *                                                                         | *                                       | *                                            | *                                                | 2/Not provided                                                            | NA                                      | 0/Not provided                               | NA                                               |
| Bats et al <sup>18</sup>              | 16                                       | Biopsy used as reference standard                                         | NA                                      |                                              |                                                  | Not specified/161                                                         | NA                                      | Not specified/161                            | NA                                               |
| Manchanda et al <sup>19</sup>         | 7                                        | 5/69                                                                      | 13.8                                    | 3/69                                         | 23                                               | 2/69                                                                      | 34.5                                    | 2/69                                         | 34.5                                             |
| Stuckless et al <sup>20</sup>         | 6                                        | Not specified                                                             | NA                                      | Not specified                                | NA                                               | Not specified                                                             | NA                                      | Not specified                                | NA                                               |
| Helder-Woolderink et al <sup>21</sup> | 25                                       | 0/117                                                                     |                                         | 0/117                                        |                                                  | 0/266                                                                     |                                         | 0/266                                        |                                                  |

|                                  |    |                |      |                |       |                |       |                |       |
|----------------------------------|----|----------------|------|----------------|-------|----------------|-------|----------------|-------|
| Douay-Hauser et al <sup>22</sup> | 26 | 1/380          | 380  | 1/380          | 380   | 0/410          |       | 0/410          |       |
| Ketabi et al <sup>23</sup>       | 48 | *              | *    | *              | *     | 2/1945         | 972.5 | 2/1945         | 972.5 |
| Tzortzatos et al <sup>24</sup>   | 5  | 5/Not provided | NA   | 3/Not provided | NA    | 0/Not provided | NA    | 0/Not provided | NA    |
| Gosset et al <sup>25</sup>       | 38 | Not specified  | NA   | Not specified  | NA    | Not specified  | NA    | 0/Not provided | NA    |
| Nebgen et al <sup>26</sup>       | 6  | 13/215         | 16.5 | 2/215          | 107.5 |                |       |                |       |
| Eikenboom et al <sup>27</sup>    | 33 | 3/244          | 81.3 | 1/244          | 244   | 0/522          |       | 0/522          |       |

NNS, Number Needed to Screen; NA, not available as there was insufficient information to calculate; \*Study did not use biopsy or was only indicated by abnormal TVUS; #Study did not use TVUS; <sup>a</sup> excludes interval cancers and cancers presenting symptomatically; @Study did not screen for ovarian cancer; OC, ovarian cancer
